# Supplementary material for: Elucidating the Role of MicroRNA-18a in Propelling a Hybrid Epithelial–Mesenchymal Phenotype and Driving Malignant Progression in ER-Negative Breast Cancer
Source: MDPI journal article supplement (doi:10.3390/cells13100821), 2024-05-10

## Elucidating the role of microRNA-18a in propelling a hybrid epithelial-mesenchymal phenotype and driving malignant progression in ER-negative breast cancer

Madhumathy G Nair<sup>1#</sup>, Apoorva D Mavatkar<sup>1\*</sup>, Chandrakala M Naidu <sup>1\*</sup>, Snijesh VP<sup>1</sup>, Anupama CE<sup>1</sup>, Savitha Rajarajan<sup>1</sup>, Sarthak Sahoo<sup>2</sup>, Gayathri Mohan<sup>3</sup>, Vishnu Sunil Jaikumar <sup>4</sup>, Rakesh S Ramesh<sup>5</sup>, Srinath BS<sup>6</sup>, Mohit Kumar Jolly<sup>2</sup>, Tessy Thomas Maliekal<sup>3</sup>, Jyothi S Prabhu<sup>1</sup>

**Supplementary Figure S1: Expression level of *BIRC3*, *HIF1A*, *DICER* and *CDK19* after miR-18a inhibition as measured by q-PCR**

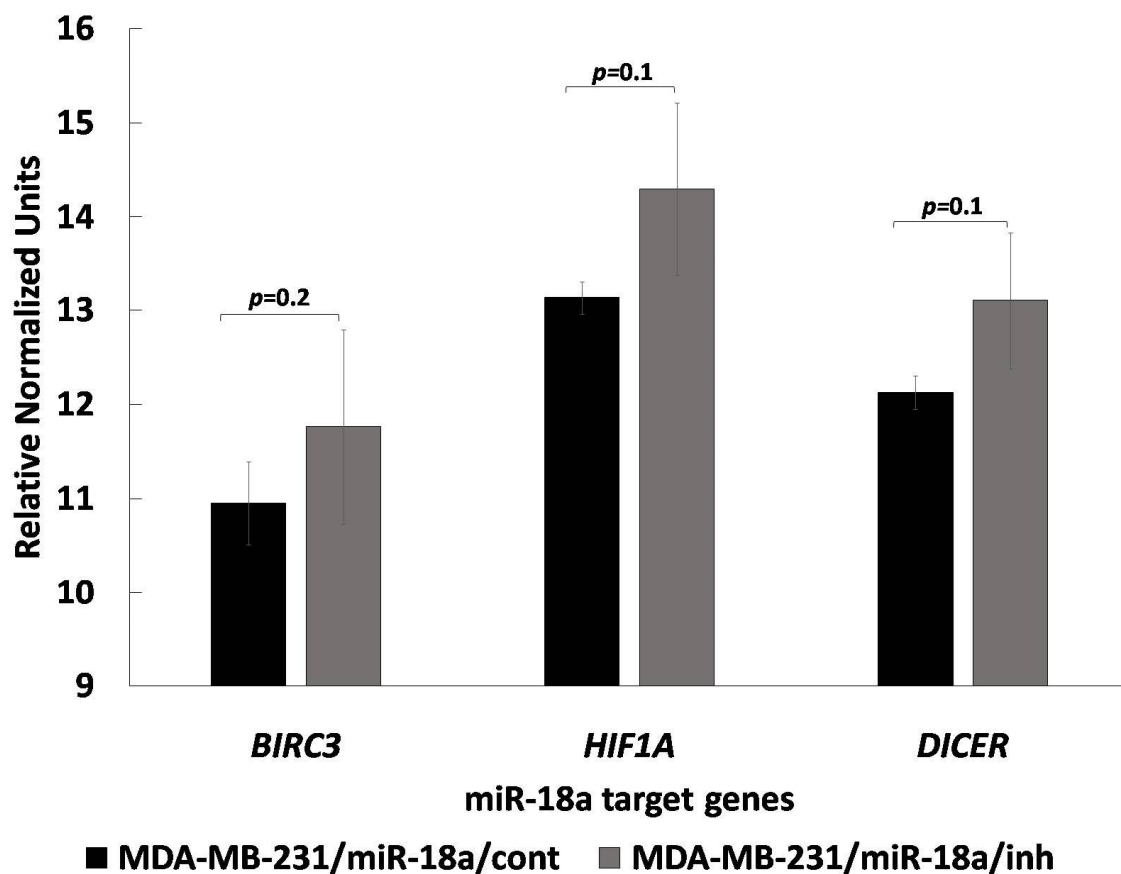

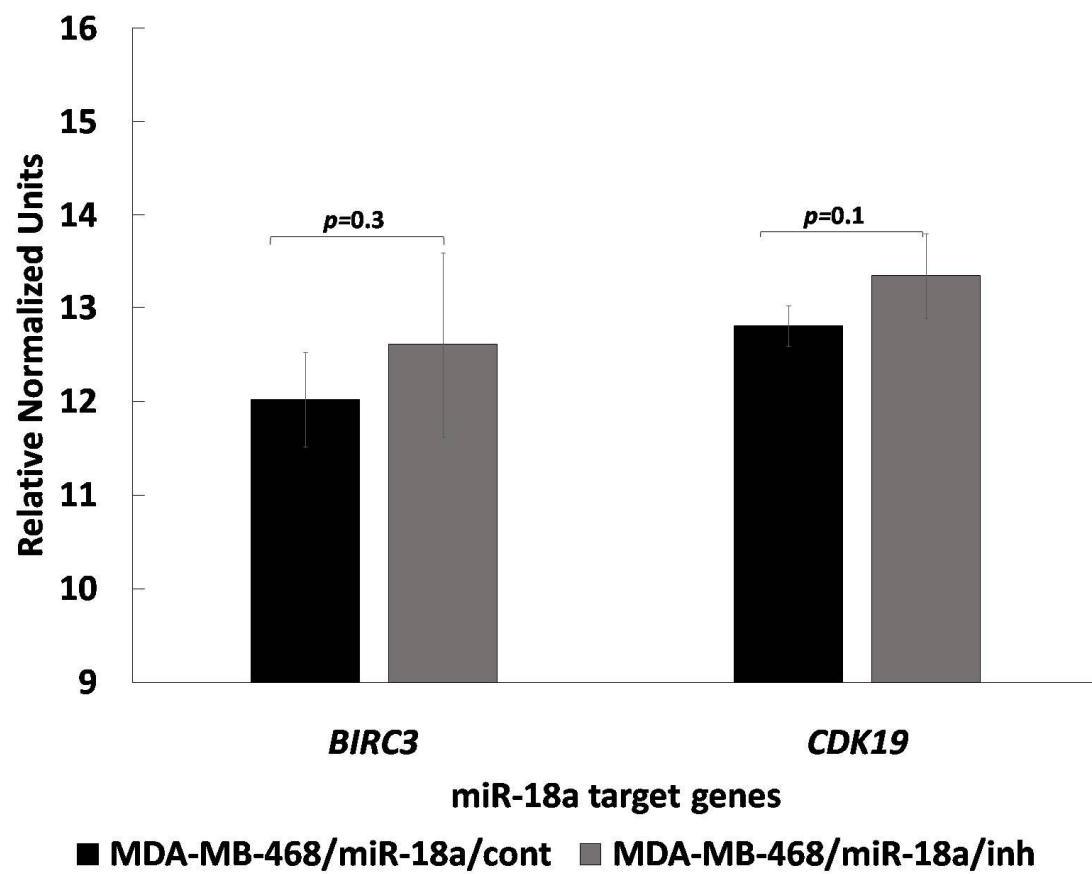

**Supplementary Figure S2: Quantitative assessment of CD44 and CD24 expression in MDA-MB-453/miR-18a/cont and MDA-MB-453/miR-18a/inh as assessed by flow cytometry (cumulative result from 3 independent trials).**

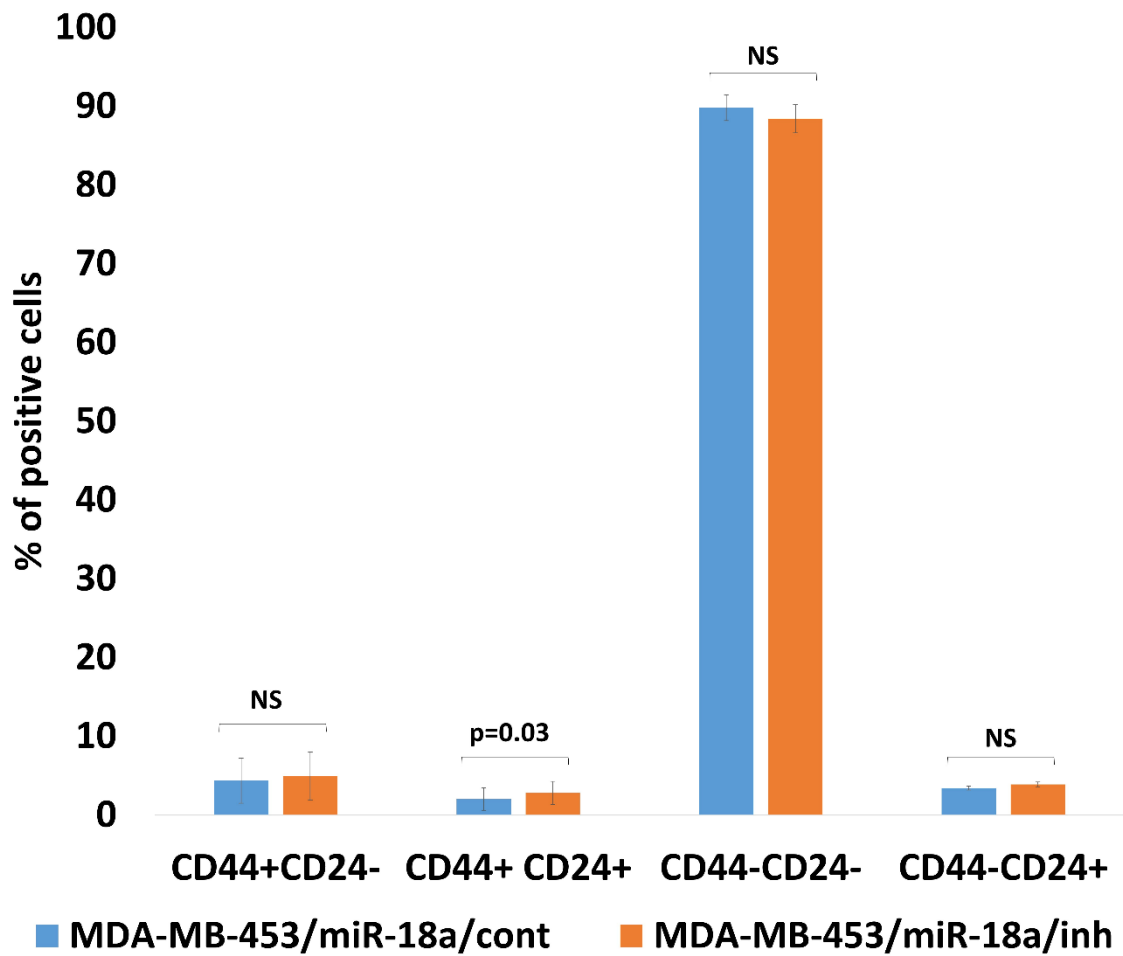

**Supplementary Figure S3: Change in protein expression levels of MMP9 levels in MDA-MB-453/miR-18a/cont and MDA-MB-453/miR-18a/inh cells.**

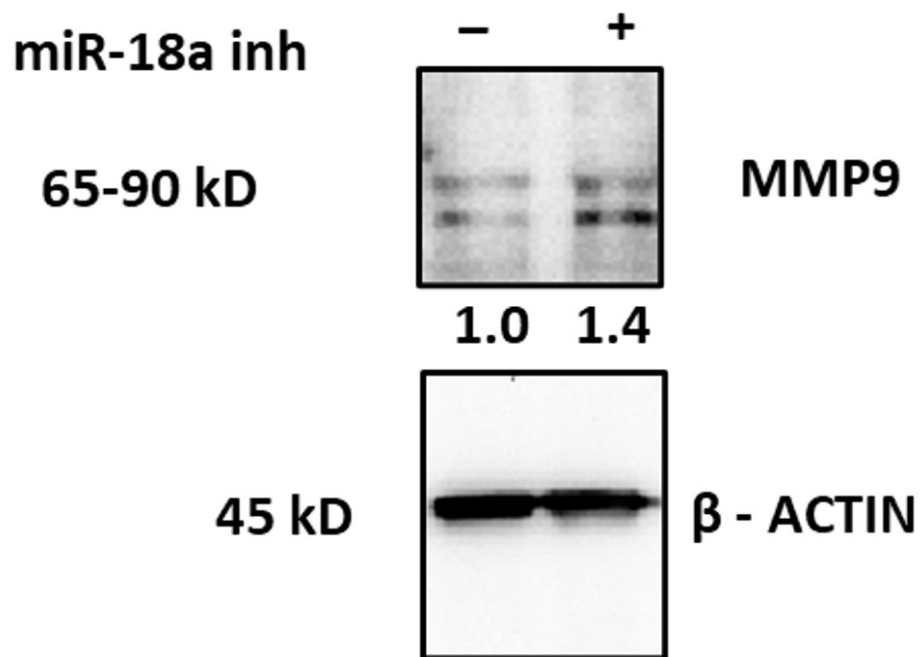

Supplementary Figure S4: DEGs associated with EMT and drug resistance in miR-18a/low, ER-negative tumours of METABRIC

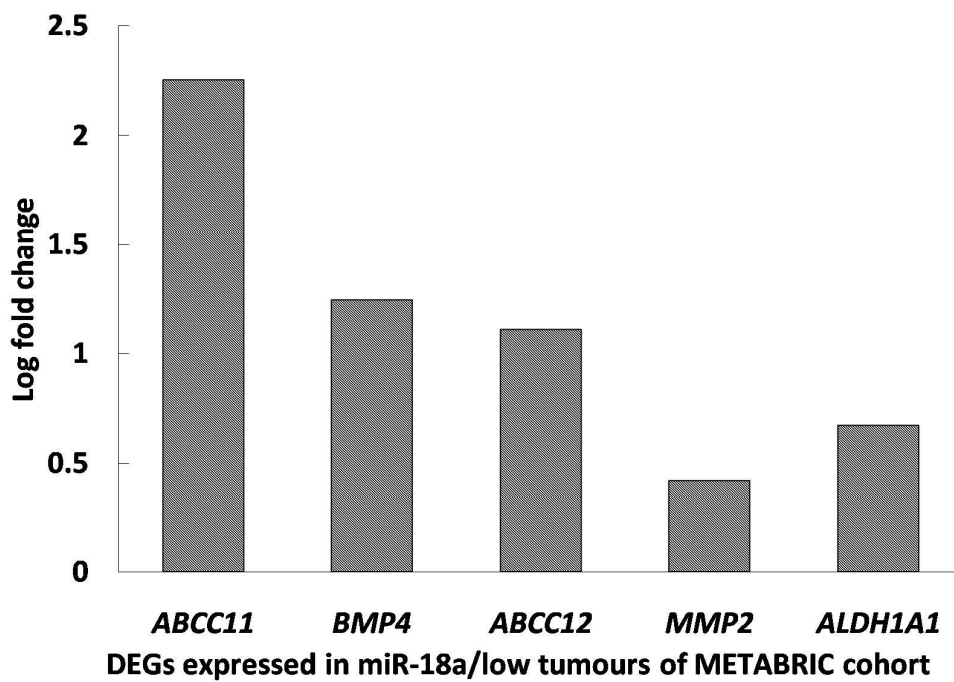

TCGA

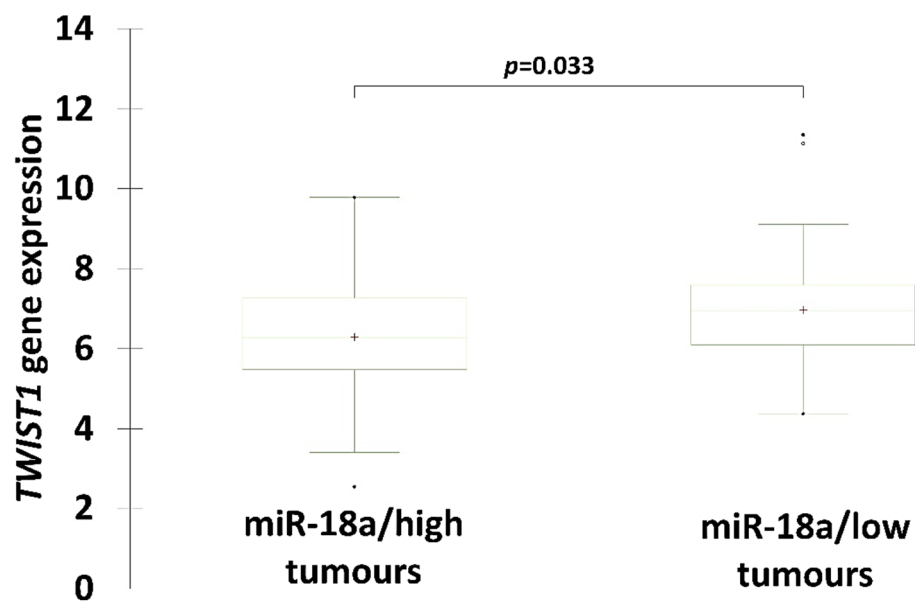

# METABRIC

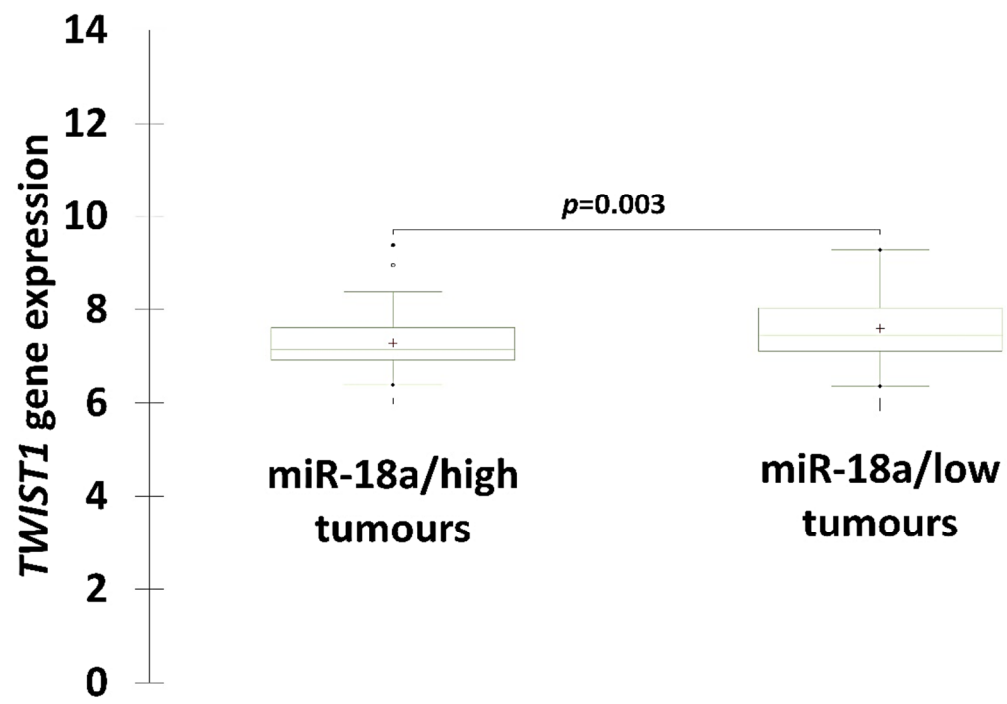

**Supplementary Figure S5a: The SI index in percentage calculated for MDA-MB-468/miR-18a/inh when compared to MDA-MB-468/miR-18a/cont (calculated with reference to MCF10A).**

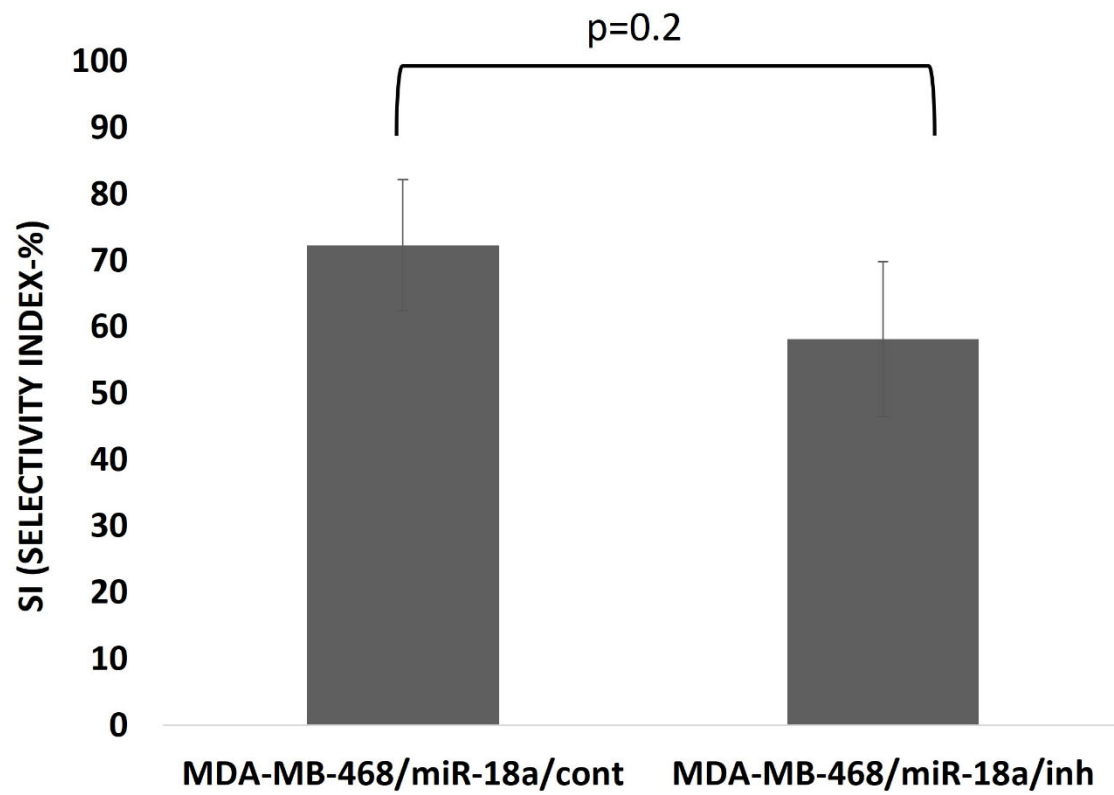

Supplementary Figure S5b: Expression level of stemness genes in ALDH1A1-DsRed2N1 cells vs DsRed2N1 cells.

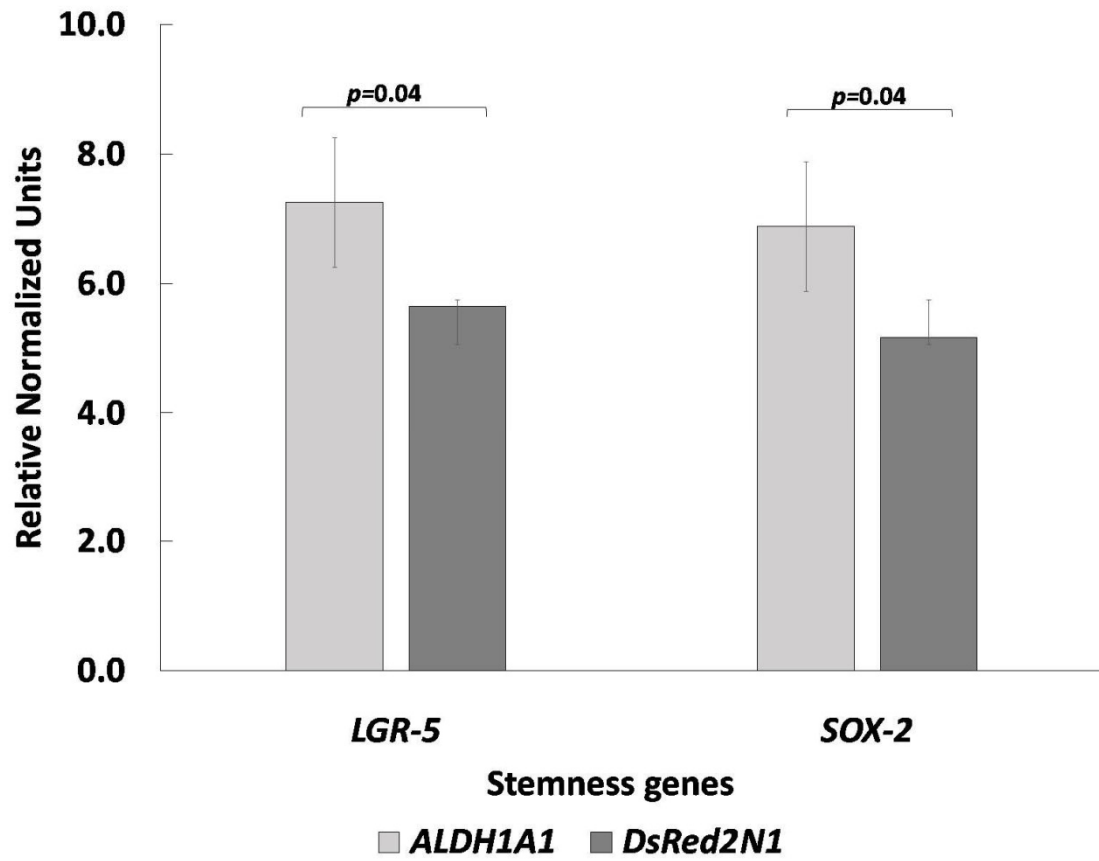

**Supplementary Figure S6: Representative images of spheres obtained from MDA-MB-453/miR-18a/cont and MDA-MB-453/miR-18a/inh cells and table and graph depicting clonogenicity (stem cell frequency) calculated from extreme limiting dilution assay performed on MDA-MB-453/miR-18a/cont and MDA-MB-453/miR-18a/inh groups across the same initial seeding dose range of 1-1000 cells.**

| Cell number         | MDA-MB-453 /miR/18a/control | MDA-MB-453 /miR/18a/inhibitor |
|---------------------|-----------------------------|-------------------------------|
| 1000                | 9                           | 17                            |
| 500                 | 6                           | 15                            |
| 100                 | 4                           | 8                             |
| 1                   | 4                           | 11                            |
| Stem cell frequency | 1/929                       | 1/233                         |
| p value = 9.69e-09  |                             |                               |

**MDA-MB-453/miR-18a/control**

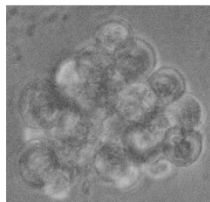

**MDA-MB-453/miR-18a/inhibitor**

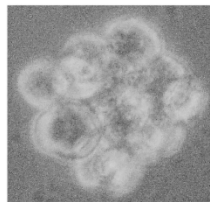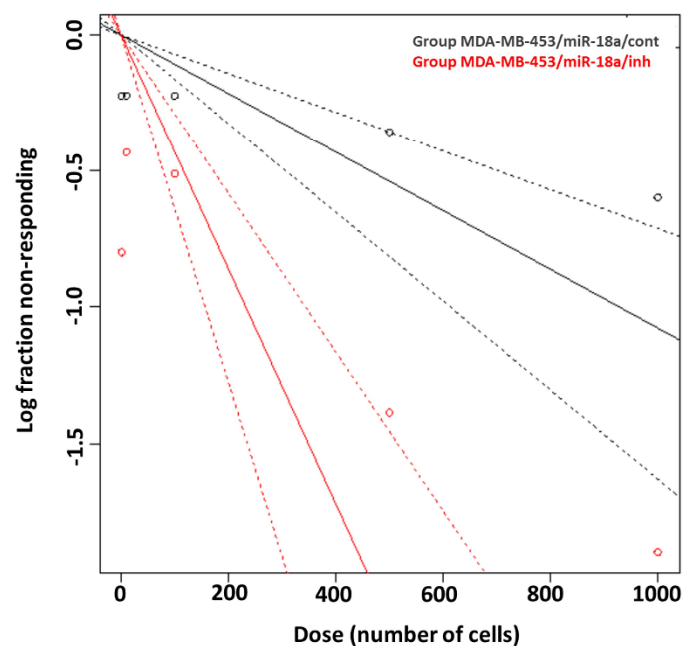

**Supplementary Figure S7a: CIBERSORT analysis depicting the proportions of M1 and M2 macrophages in miR-18a/high and miR-18a/low tumours of TCGA and METABRIC cohorts respectively, immune cell AI analysis depicting proportion of Type 2 T helper cells and Type 1 regulatory T cells in the METABRIC cohort.**

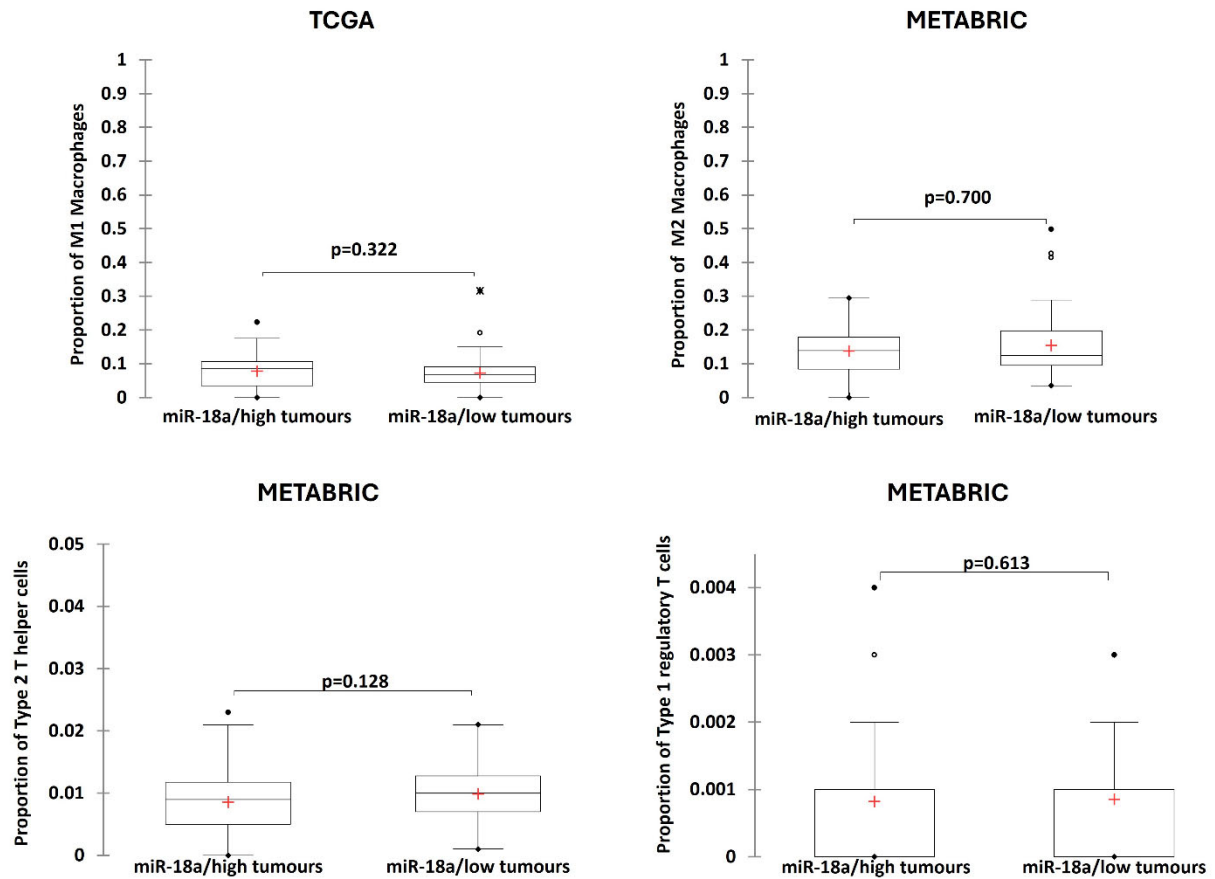

**Supplementary Figure S7b: Change in protein expression levels of HIF-1 $\alpha$  levels in MDA-MB-231/miR-18a/cont and MDA-MB-231/miR-18a/inh cells.**

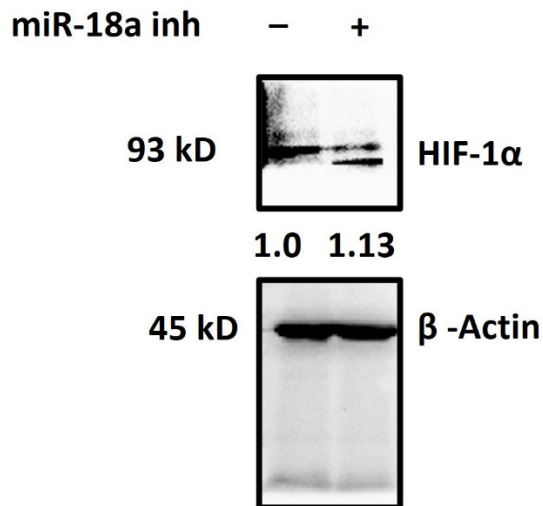

**Supplementary Figure S7c: The heatmap representing the pattern of expression of filtered hypoxia genes in the miR-18a/low tumors of TCGA**

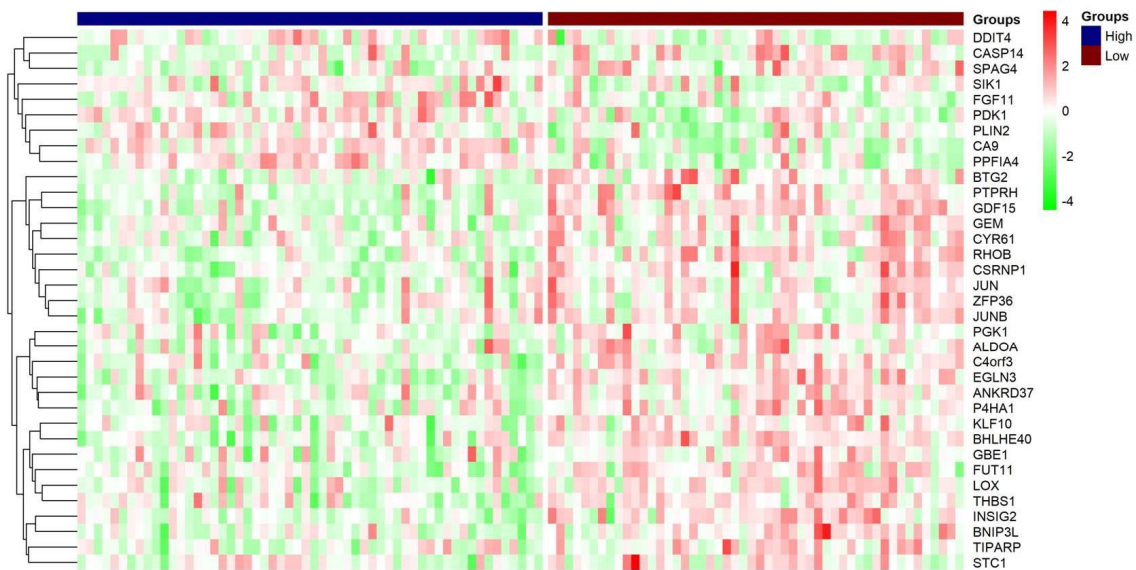

**Supplementary Figure S7d: Representative H&E stained image of tumour from mice injected with miR-18a/antagomiR and and antagomiR negative control cells.**

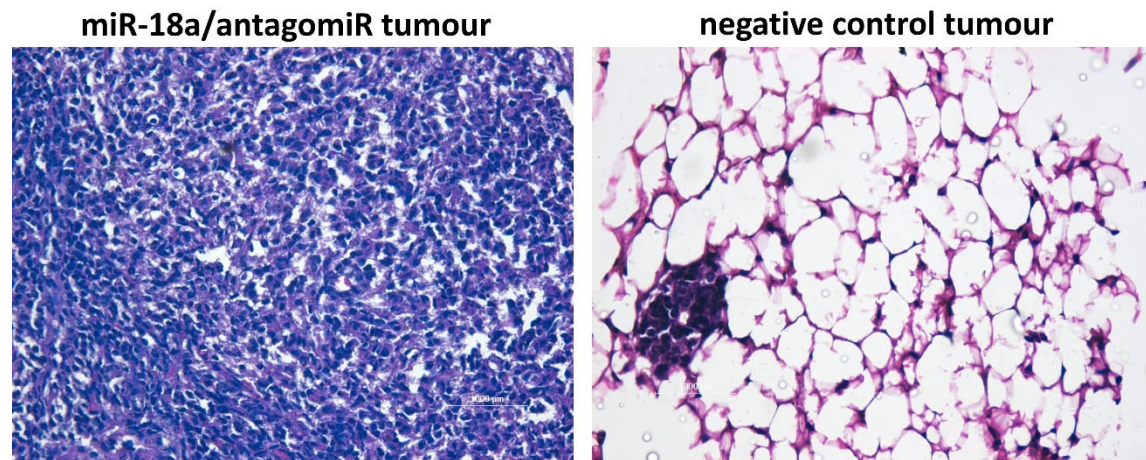

**Supplementary Figure S7e: Change in protein expression levels of E-cadherin and Vimentin levels in MDA-MB-231/miR-18a/cont and MDA-MB-231/miR-18a/inh cells.**

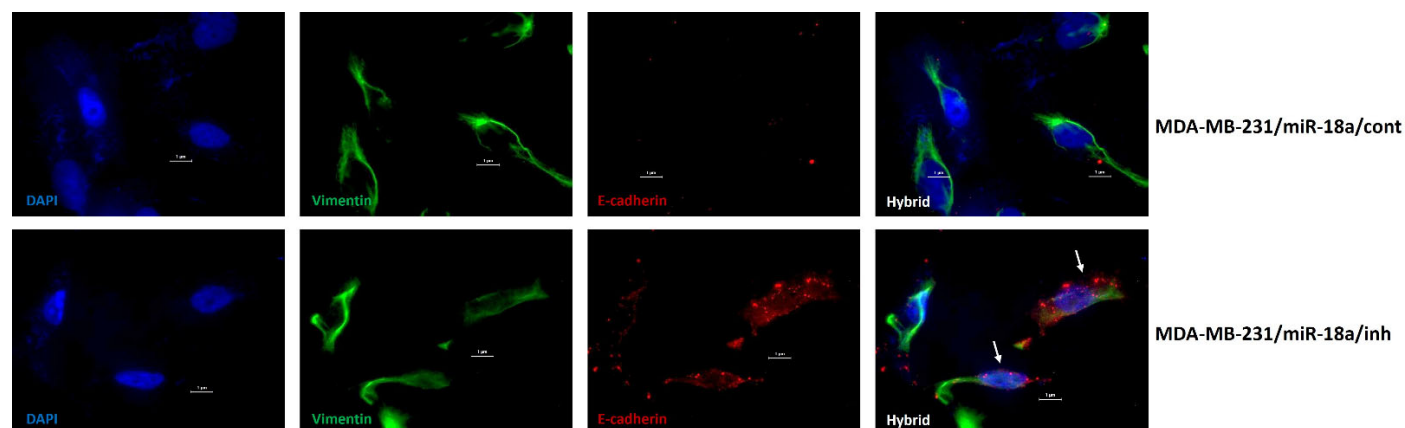

Supplementary Figure S8: Mutational spectrum analysis depicting higher PIK3CA mutation load in both TNBC and ER-HER2+ tumors of the miR-18a/low ER-negative tumours of METABRIC cohort.

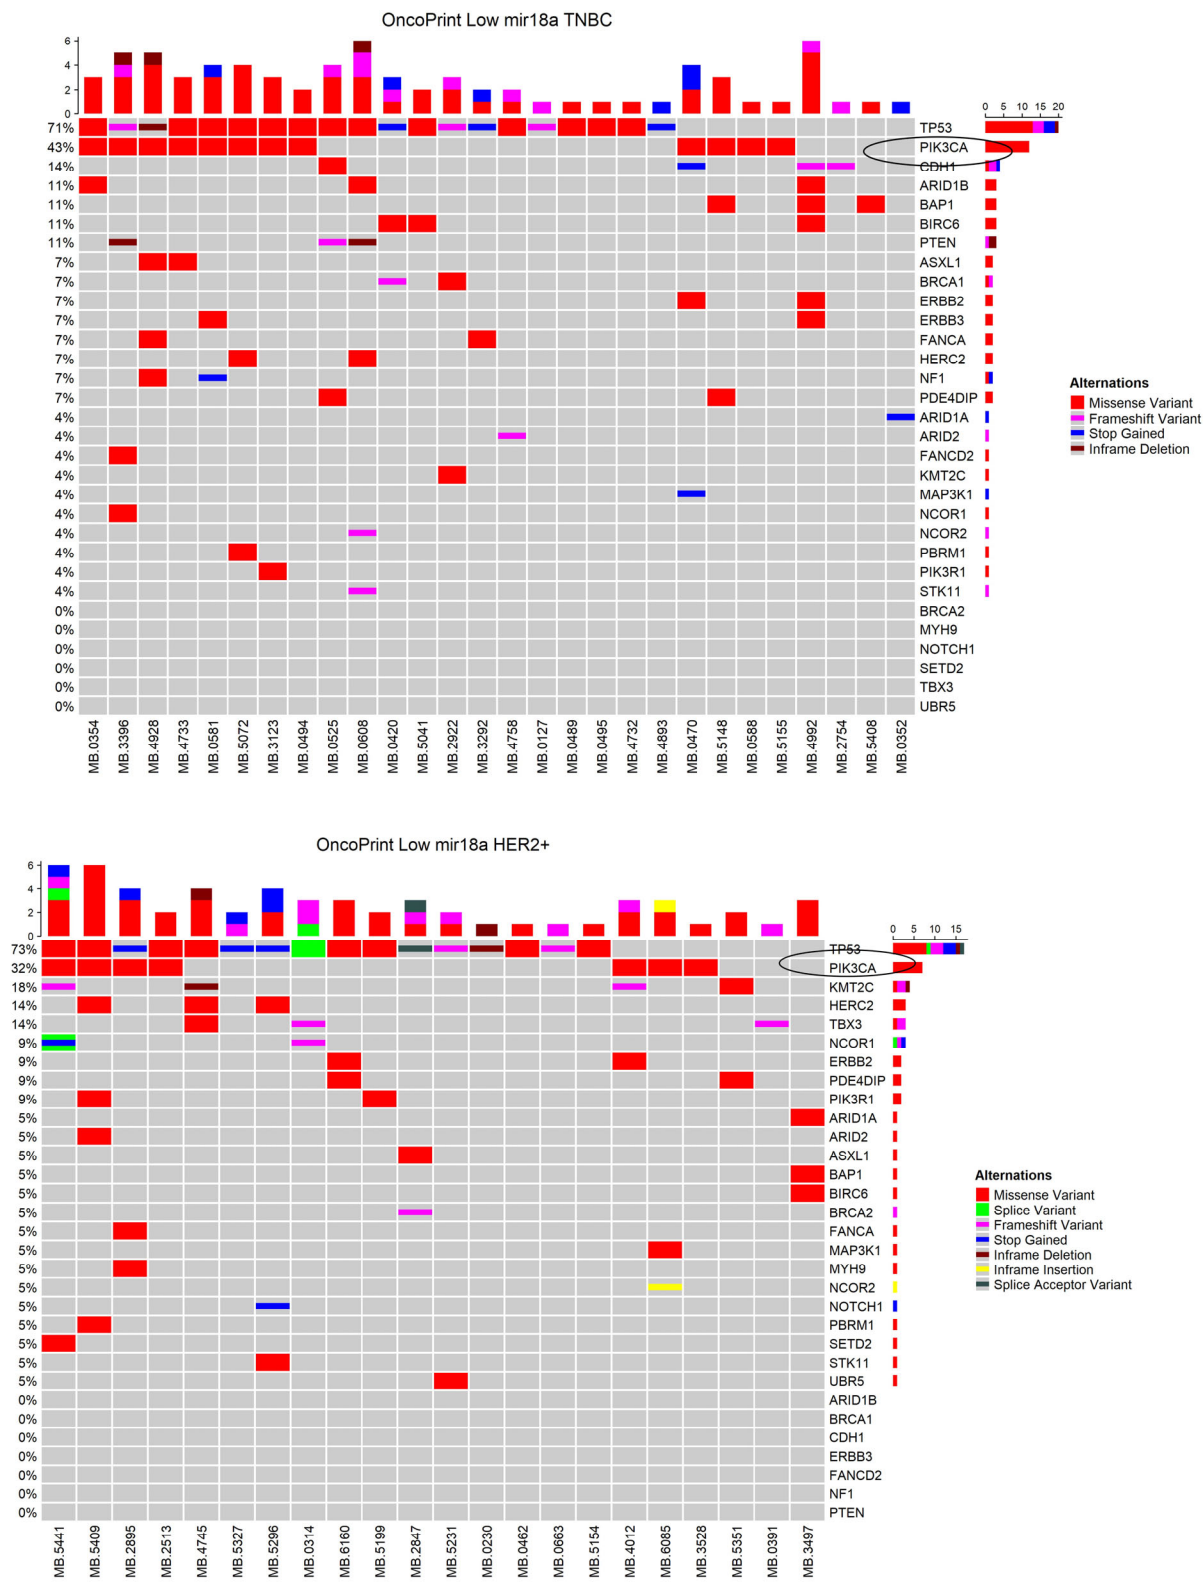

**Supplementary Figure S9: Partial EMT score between the TNBC and ER-HER2+ tumors of the miR-18a/low ER-negative tumours of TCGA and METABRIC cohort.**

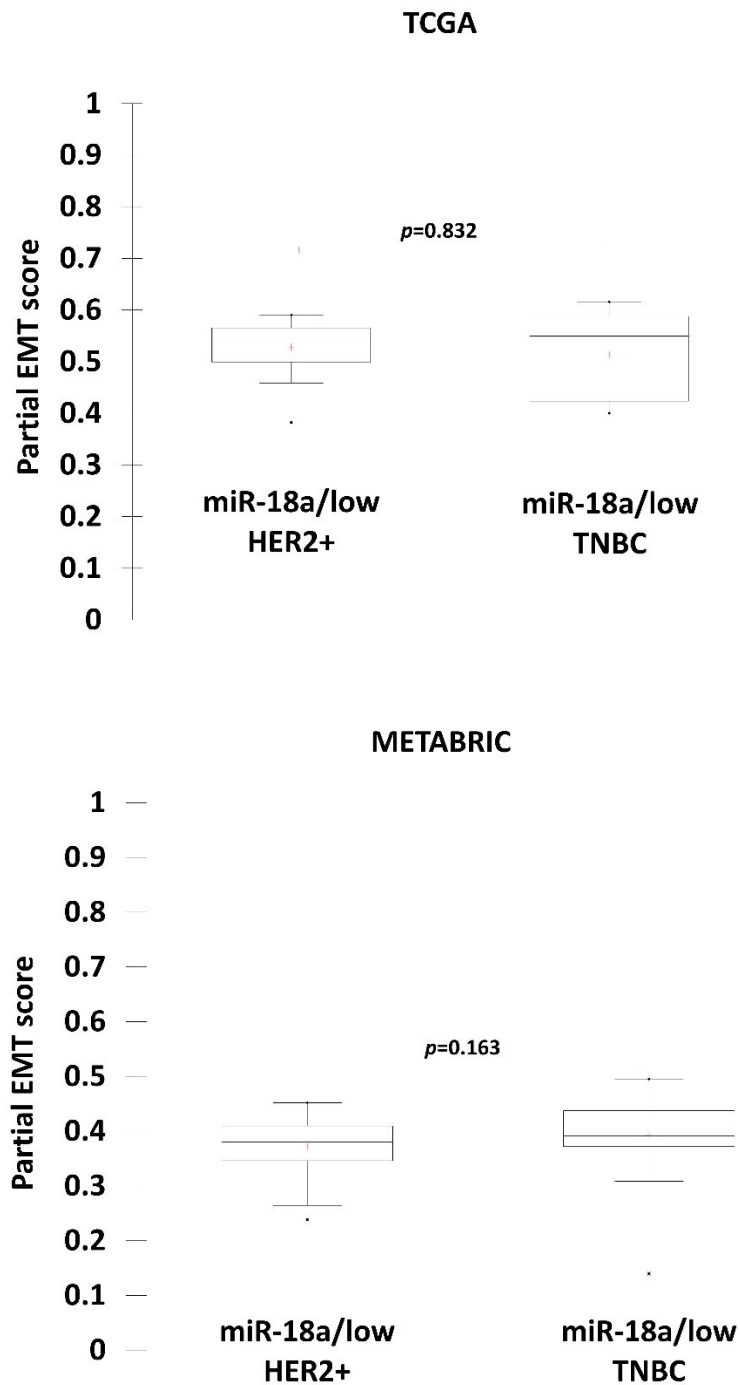

Partial EMT Score derived from - Puram SV, Tirosh I, Parikh AS, Patel AP, Yizhak K, Gillespie S, Rodman C, Luo CL, Mroz EA, Emerick KS, Deschler DG, Varvares MA, Mylvaganam R, Rozenblatt-Rosen O, Rocco JW, Faquin WC, Lin DT, Regev A, Bernstein BE. Single-Cell Transcriptomic Analysis of Primary and Metastatic Tumor Ecosystems in Head and Neck Cancer. Cell. 2017 Dec 14;171(7):1611-1624.e24. doi: 10.1016/j.cell.2017.10.044. Epub 2017 Nov 30. PMID: 29198524; PMCID: PMC5878932.

**Supplementary Figure S10: 77 gene EMT Score between the TNBC and ER-HER2+ tumors of the miR-18a/low ER-negative tumours of the TCGA and METABRIC cohort.**

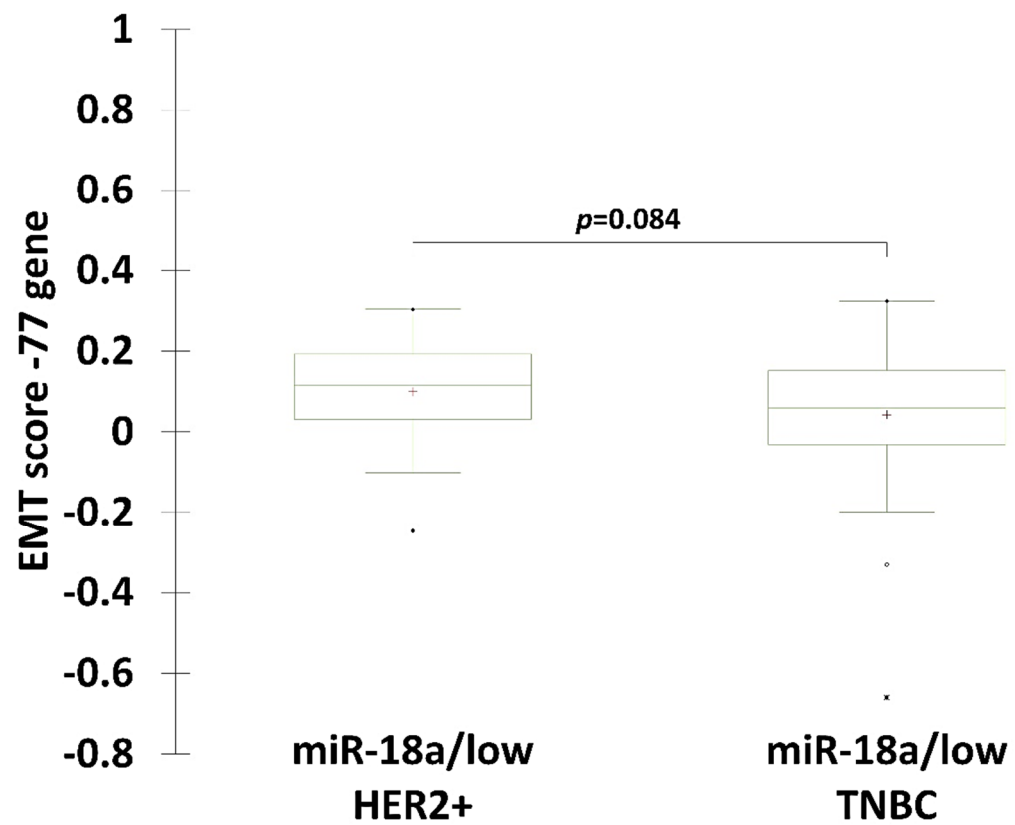

**Supplementary Table S1 : List of antibodies and their dilutions**

| <b>Sl. No</b> | <b>Antibody</b>    | <b>Purpose</b>                   | <b>Product details</b>                                              | <b>Dilution</b> |
|---------------|--------------------|----------------------------------|---------------------------------------------------------------------|-----------------|
| 1             | TNFAIP3            | Western Blot                     | Rabbit monoclonal EPR2663-ab92324 Abcam                             | 1:1000          |
| 2             | CD49f              | Western Blot                     | Rabbit monoclonal EPR5578-ab124924 Abcam                            | 1:5000          |
| 3             | Cytokeratin-19     | Western Blot                     | Rabbit monoclonal EP1580Y-ab52625 Abcam                             | 1:10000         |
| 4             | MMP9               | Western Blot                     | Rabbit monoclonal- PA5-27191 Invitrogen                             | 1:1000          |
| 5             | RAC3               | Western Blot                     | Rabbit monoclonal EPR6679(B)-ab124943 Abcam                         | 1:5000          |
| 6             | ALDH1              | Western Blot                     | Mouse monoclonal- 611194 BD Biosciences                             | 1:500           |
| 7             | HIF1- $\alpha$     | Western Blot                     | Rabbit monoclonal EP1215Y-ab51608 Abcam                             | 1:500           |
| 8             | CD44               | Flow cytometry                   | CD44 (156-3C11) Mouse mAb-3570 Cell signalling technology           | 1:100           |
| 9             | CD24               | Flow cytometry                   | CD24 (M1/69) Rat mAb PE Conjugate- 90378 Cell Signalling technology | 1:660           |
| 10            | E-cadherin         | Western Blot /Immunofluorescence | Rabbit monoclonal EP700Y-ab40772 Abcam                              | 1:5000/1:500    |
| 11            | Vimentin           | Immunofluorescence               | Mouse clone V9- AM074-5M Bio-genex                                  | 1:25            |
| 12            | Integrin $\beta$ 3 | Immunohistochemistry             | Rabbit monoclonal EPR2417Y-ab75872 Abcam                            | 1:500           |

**Supplementary Table S2. Clinico-pathological characteristics of 211 ER-negative patients used for analysis from TCGA dataset.**

|                              | <b>All N (%)<br/>(n = 211)</b> | <b>miR-18a/low<br/>(n = 50)</b> | <b>miR-18a/high<br/>(n = 57)</b> |
|------------------------------|--------------------------------|---------------------------------|----------------------------------|
| <hr/>                        |                                |                                 |                                  |
| <b>Age (y)</b>               |                                |                                 |                                  |
| Mean                         | 55                             | 57                              | 52                               |
| Median                       | 55                             | 58                              | 51                               |
| <b>Tumor Size<br/>(cm)</b>   |                                |                                 |                                  |
| T1                           | 33 (22)                        | 9 (26)                          | 4 (10)                           |
| T2                           | 100 (66)                       | 19 (56)                         | 34 (83)                          |
| T3                           | 13 (9)                         | 3 (9)                           | 2 (5)                            |
| T4                           | 5 (3)                          | 3 (9)                           | 1 (2)                            |
| <b>Stage</b>                 |                                |                                 |                                  |
| 1                            | 20 (14)                        | 3 (9)                           | 2 (5)                            |
| 2                            | 96 (65)                        | 20 (63)                         | 31 (76)                          |
| 3                            | 29 (20)                        | 9 (28)                          | 8 (19)                           |
| 4                            | 2 (1)                          |                                 |                                  |
| <b>Lymph<br/>Node status</b> |                                |                                 |                                  |
| Positive                     | 71 (39)                        | 17 (49)                         | 15 (30)                          |
| Negative                     | 112 (61)                       | 18 (51)                         | 35 (70)                          |
| <b>Menopausal<br/>status</b> |                                |                                 |                                  |
| Pre                          | 46 (24)                        | 12 (26)                         | 18 (36)                          |
| Post                         | 142 (76)                       | 35 (74)                         | 32 (64)                          |
| <b>Her2<br/>positivity</b>   |                                |                                 |                                  |
| Negative                     | 111 (62)                       | 17 (40)                         | 39 (76)                          |
| Positive                     | 37 (21)                        | 18 (43)                         | 4 (8)                            |
| Equivocal                    | 31 (17)                        | 7 (17)                          | 8 (16)                           |
| <hr/>                        |                                |                                 |                                  |

**Supplementary Table S3. Clinico-pathological characteristics of 265 ER-negative patients used for analysis from METABRIC dataset.**

|                          | <b>All N (%)</b><br><b>(n = 265)</b> | <b>miR-18a/low</b><br><b>(n = 54)</b> | <b>miR-18a/high</b><br><b>(n = 62)</b> |
|--------------------------|--------------------------------------|---------------------------------------|----------------------------------------|
| <b>Age (y)</b>           |                                      |                                       |                                        |
| Mean                     | 55                                   | 59                                    | 53                                     |
| Median                   | 55                                   | 60                                    | 52                                     |
| <b>Tumor Size (cm)</b>   |                                      |                                       |                                        |
| Mean                     | 2.9                                  | 2.4                                   | 2.9                                    |
| Median                   | 2.5                                  | 2.2                                   | 2.5                                    |
| <b>Stage</b>             |                                      |                                       |                                        |
| 0                        | 2 (1)                                | 1 (2)                                 | 0 (0)                                  |
| 1                        | 63 (27)                              | 17 (34)                               | 9 (15)                                 |
| 2                        | 127 (55)                             | 22 (44)                               | 42 (71)                                |
| 3                        | 39 (17)                              | 10 (20)                               | 8 (14)                                 |
| <b>Grade</b>             |                                      |                                       |                                        |
| I                        | 2 (1)                                | 1 (2)                                 | 0 (0)                                  |
| II                       | 33 (13)                              | 11 (22)                               | 3 (5)                                  |
| III                      | 223 (86)                             | 38 (76)                               | 58 (95)                                |
| <b>Lymph Node status</b> |                                      |                                       |                                        |
| Positive                 | 139 (52)                             | 27 (50)                               | 33 (53)                                |
| Negative                 | 126 (48)                             | 27 (50)                               | 29 (47)                                |
| <b>Menopausal status</b> |                                      |                                       |                                        |
| Pre                      | 99 (37)                              | 13 (24)                               | 27 (44)                                |
| Post                     | 166 (63)                             | 41 (76)                               | 35 (56)                                |
| <b>Her2 positivity</b>   |                                      |                                       |                                        |
| Negative                 | 187 (71)                             | 32 (59)                               | 59 (95)                                |
| Positive                 | 78 (29)                              | 22 (41)                               | 3 (5)                                  |

**Supplementary Table S4: List of luminal and basal genes**

| <b>Luminal genes</b> | <b>Basal genes</b> |
|----------------------|--------------------|
| <i>ESR1</i>          | <i>CK5/6</i>       |
| <i>GATA3</i>         | <i>Laminin</i>     |
| <i>TFF3</i>          | <i>CENPI</i>       |
| <i>FOXA1</i>         | <i>CENPK</i>       |
| <i>LIV-1</i>         | <i>CDC7</i>        |
| <i>KRT8</i>          | <i>KIF18A</i>      |
| <i>GRM4</i>          | <i>CCNE2</i>       |
| <i>GRM8</i>          | <i>STIL</i>        |
| <i>KRT18</i>         | <i>CDCA7</i>       |
| <i>PGR</i>           | <i>CKS2</i>        |
| <i>NMUR1</i>         | <i>MIA</i>         |
| <i>MUC1</i>          | <i>ANLN</i>        |
| <i>CX3CL1</i>        | <i>FABP7</i>       |
| <i>NCAM1</i>         | <i>KRT17</i>       |
| <i>XPB1</i>          | <i>KRT6b</i>       |
|                      | <i>DCS2</i>        |

**Supplementary Table S5. Clinico-pathological characteristics of 105 ER-negative patients used for analysis from our case series.**

|                          | All N (%)<br>(n= 105 patients) |
|--------------------------|--------------------------------|
| <b>Age (y)</b>           |                                |
| Mean                     | 54                             |
| Median                   | 54                             |
| <b>Tumor Size (cm)</b>   |                                |
| Mean                     | 3.5                            |
| Median                   | 3                              |
| <b>Stage</b>             |                                |
| I                        | 16 (15)                        |
| II                       | 53 (50)                        |
| III                      | 32 (30)                        |
| IV                       | 4 (4)                          |
| <b>Grade</b>             |                                |
| I                        | 6 (6)                          |
| II                       | 38 (39)                        |
| III                      | 54 (55)                        |
| <b>Lymph Node status</b> |                                |
| Positive                 | 54 (51)                        |
| Negative                 | 49 (47)                        |
| Nx                       | 2 (2)                          |
| <b>Menopausal status</b> |                                |
| Pre                      | 28(27)                         |
| Post                     | 77(73)                         |
| <b>Her2 positivity</b>   |                                |
| Equivocal                | 4 (4)                          |
| Negative                 | 72 (68)                        |
| Positive                 | 29 (28)                        |

**Supplementary Table S6. Clinical characteristics of post NACT residual tumors: Clinicopathological characteristics of (n=54) post NACT residual tumors and (n=43) tumors with adequate tissue available for estimation of integrin  $\beta$ 3 and miR-18a**

|                              | n = 54 patients (%) | n = 43 patients (%) |
|------------------------------|---------------------|---------------------|
| <b>Age</b>                   |                     |                     |
| Mean (Yrs)                   | 49                  | 49                  |
| Median (Yrs)                 | 48                  | 48                  |
| <b>Tumor Size</b>            |                     |                     |
| Mean (cm)                    | 6                   | 6                   |
| Median (cm)                  | 6                   | 6                   |
| <b>Stage</b>                 |                     |                     |
| III                          | 38 (70)             | 31 (72)             |
| IV                           | 14 (26)             | 10 (23)             |
| Nx                           | 2 (4)               | 2 (5)               |
| <b>Menopausal status</b>     |                     |                     |
| Pre                          | 24 (44)             | 19 (44)             |
| Post                         | 30 (56)             | 24 (56)             |
| <b>Estrogen Receptor</b>     |                     |                     |
| Positive                     | 30 (56)             | 22 (51)             |
| Negative                     | 24 (44)             | 21 (49)             |
| <b>Progesterone Receptor</b> |                     |                     |
| Positive                     | 28 (52)             | 21 (49)             |
| Negative                     | 26 (48)             | 22 (51)             |
| <b>HER2</b>                  |                     |                     |
| Positive                     | 18 (33)             | 13 (30)             |
| Negative                     | 29 (54)             | 25 (58)             |
| Equivocal                    | 7 (13)              | 5 (12)              |

**Supplementary Table S7: List of primer sequences used in q-RT-PCR analysis**

| SI No. | Gene          | PRIMER SEQUENCE                                                       |
|--------|---------------|-----------------------------------------------------------------------|
| 1      | <i>ACTB</i>   | 5'-TTCCTGGGCATGGAGTC-3'<br>3'-CAGGTCTTTGCGGATGTC-5'                   |
| 2      | <i>ANLN</i>   | 5'-ACAGCCACTTTCAGAAGCAAG-3'<br>3'-CGATGGTTTTGTACAAGATTTCTC-5'         |
| 3      | <i>BCL2</i>   | 5'-TACCTGAACCGGCACCTG-3'<br>3'-GCCGTACAGTTCCACAAAGG-5'                |
| 4      | <i>BIRC3</i>  | 5'-CCATGGGTTCAACATGCCAAGTGGT-3'<br>3'-GGGTAACTGGCTTGAACCTGACGG-5'     |
| 5      | <i>BMPR1B</i> | 5'-ATTCCCAAACCGGTGGAGCAGT-3'<br>3'-TTGATGCAGGATTGTGAGCCCAGC-5'        |
| 6      | <i>CDK19</i>  | 5'-TACCTCCATGCAAATTGGGTGCT-3'<br>3'-R-TTTGACTCTCCCCCTCTCAGGA-5'       |
| 7      | <i>DICER</i>  | 5'-TTAACCTTTTGGTGTTTGATGAGTGT-3'<br>3'-GCGAGGACATGATGGACAATT-5'       |
| 8      | <i>HIF1A</i>  | 5'-TGCTTACACACAGAAATGGCCT-3'<br>3'-TAGTTAGGGTACACTTCATTCTGAG-5'       |
| 9      | <i>ITGB3</i>  | 5'-CCCACCAGAGGCCCTCGAAA-3'<br>3'-AAGCGGGTCACCTGGTCAGT-5'              |
| 10     | <i>LGR5</i>   | 5'-GACCATTGCCTACACCAAGC-3'<br>3'-GAGCAACAGGGCAATGTGTT-5'              |
| 11     | <i>PGR</i>    | 5'-TTATAATTCGAGGCGGTTAGTGTTT-3'<br>3'-TCGAACTTCTACTAACTCCGTACTACGA-5' |
| 12     | <i>PUM1</i>   | 5'-CCGGAGATTGCTGGACATATAA-3'<br>3'-TGGCACGCTCCAGTTTC-5'               |
| 13     | <i>RPLP0</i>  | 5'-GGCTGTGGTGCTGATGGGCAAGAA-3'<br>3'-TTCCCCCGGATATGAGGCAGCAGT-5'      |
| 14     | <i>SALL4</i>  | 5'-GGCCAATAGTCAAGCCGAAA-3'<br>3'-TCCGACCTTCATCTCAGTG-5'               |
| 15     | <i>ZEB2</i>   | 5'-TGCACAGAGTGTGGCAAGGC-3'<br>3'-TGGGCACTCGTAAGGTTTTTCACC-5'          |

Details on literature survey:

The literature survey as part of the manuscript was conducted using Pubmed search and Google scholar search. The key words employed for the search was ‘miR-18a ER-Negative breast cancer’, ‘miR-18a cancer’, ‘miRNA targeting’.

The time period for literature survey was 2009-2022.

Western blot - Densitometric analysis and raw blot images

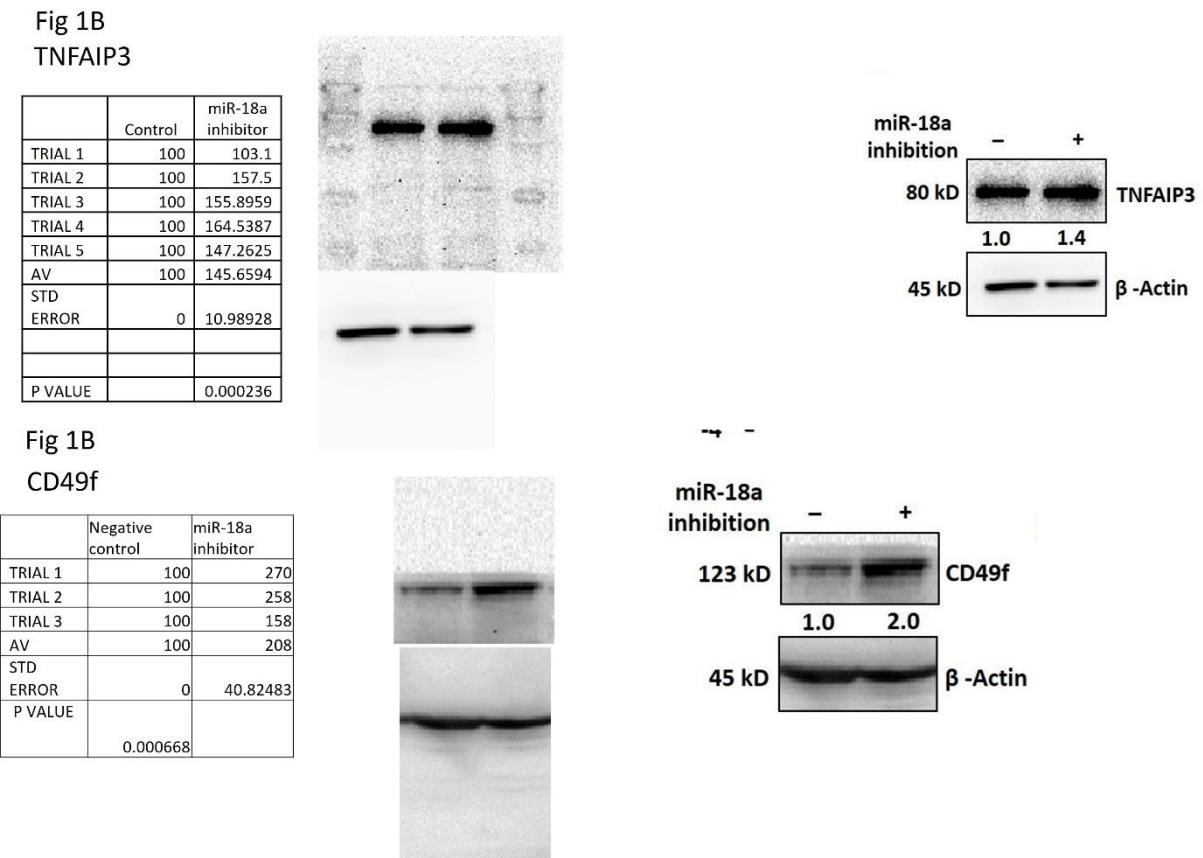

Fig 1B  
Cytokeratin 19

|           | Negative control | miR-18a inhibitor |
|-----------|------------------|-------------------|
| TRIAL 1   | 100              | 181               |
| TRIAL 2   | 100              | 149               |
| TRIAL 3   | 100              | 125               |
| TRIAL 4   | 100              | 151.6667          |
| AV        | 100              | 151.6667          |
| STD ERROR | 0                | 16.2207           |
| P VALUE   | 0.016684         |                   |

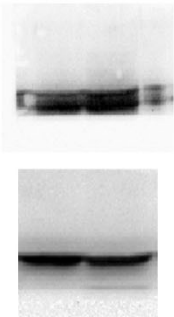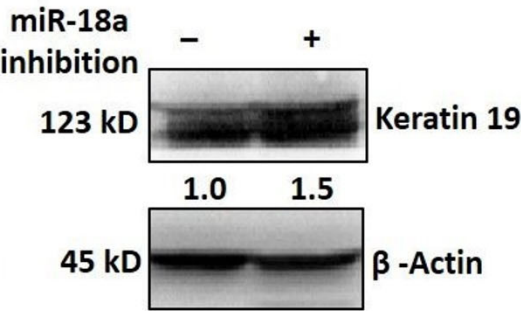

Fig 2C  
E-cadherin

|           | Negative control | miR-18a inhibitor |
|-----------|------------------|-------------------|
| TRIAL 1   | 100              | 86                |
| TRIAL 2   | 100              | 73.2              |
| TRIAL 3   | 100              | 94.5              |
| AV        | 100              | 84.56666667       |
| STD ERROR | 0                | 6.190404761       |
| P VALUE   | 0.03363          |                   |

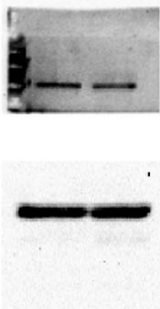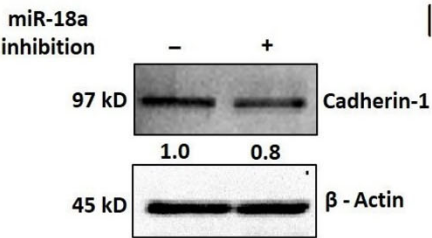

Fig 2C MMP9

|           | Negative control | miR-18a inhibitor |
|-----------|------------------|-------------------|
| TRIAL 1   | 100              | 137.2             |
| TRIAL 2   | 100              | 171.8             |
| TRIAL 3   | 100              | 157.8             |
| AV        | 100              | 155.6             |
| STD ERROR | 0                | 10.04855          |
| P VALUE   | 0.002607         |                   |

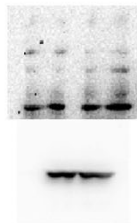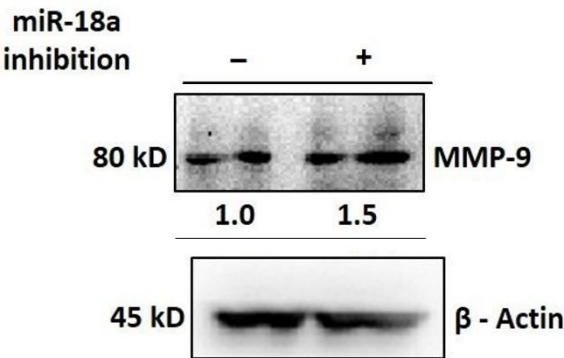

Fig 2C RAC3

|           | Negative control | miR-18a inhibitor |
|-----------|------------------|-------------------|
| TRIAL 1   | 100              | 147               |
| TRIAL 2   | 100              | 150               |
| TRIAL 3   | 100              | 131.5             |
| AV        | 100              | 142.8333          |
| STD ERROR | 0                | 5.732461          |
| P VALUE   | 0.000857         |                   |

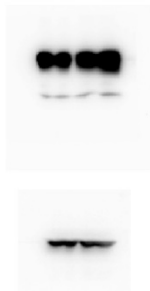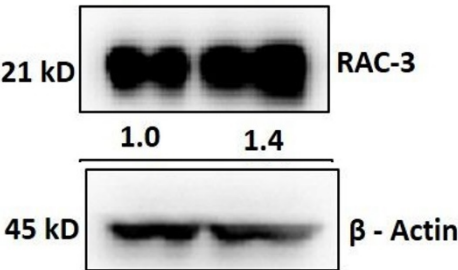

Fig 3H      ALDH1A1

|           | Negative control | miR-18a inhibitor |
|-----------|------------------|-------------------|
| TRIAL 1   | 100              | 115               |
| TRIAL 2   | 100              | 191               |
| TRIAL 3   | 100              | 144               |
| AV        | 100              | 150               |
| STD ERROR | 0                | 22.14347          |
| P VALUE   | 0.043436135      |                   |

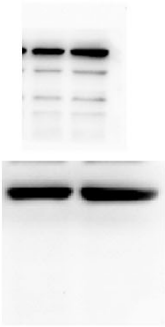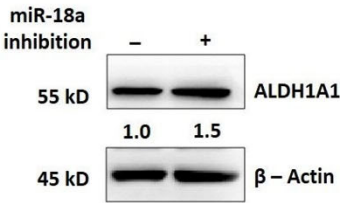

Fig 5C      HIF1A

|           | Negative control | miR-18a inhibitor |
|-----------|------------------|-------------------|
| TRIAL 1   | 100              | 331.2888          |
| TRIAL 2   | 100              | 179.2266          |
| TRIAL 3   | 100              | 147.3008          |
| AV        | 100              | 219.2721          |
| STD ERROR | 0                | 56.76155          |
| P VALUE   | 0.051752         |                   |

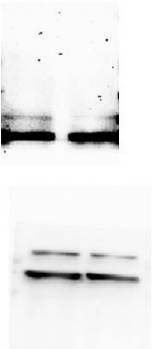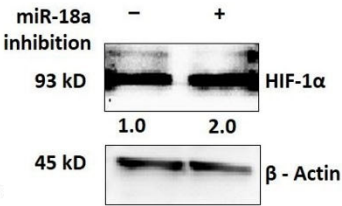

Fig S3      MMP9

|           | Negative control | miR-18a inhibitor |
|-----------|------------------|-------------------|
| TRIAL 1   | 100              | 144.5632          |
| TRIAL 2   | 100              | 191.7947          |
| TRIAL 3   | 100              | 110.622           |
| AV        | 100              | 148.9933          |
| STD ERROR | 0                | 23.53699          |
| P VALUE   | 0.052919         |                   |

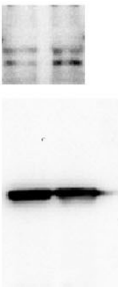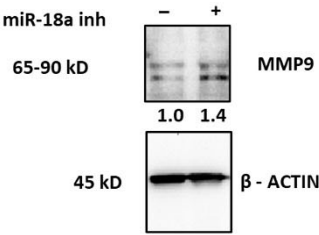

Supplement: s1 [file s1]
